# Supplementary material
Source: PubMed Central journal article supplement (PMC3387115)
Supplement: 1202367109_pnas.201202367SI.pdf [file 1202367109_pnas.201202367SI.pdf]

# Supporting Information

Hashizume et al. 10.1073/pnas.1202367109

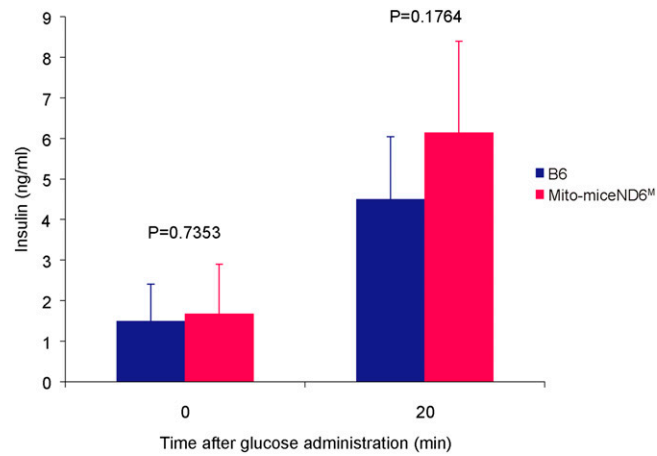

**Fig. S1.** Estimation of blood insulin levels in aged mito-miceND6<sup>M</sup> and age-matched B6 mice after glucose administration. Data are represented as mean values with SD ( $n = 5$ ).

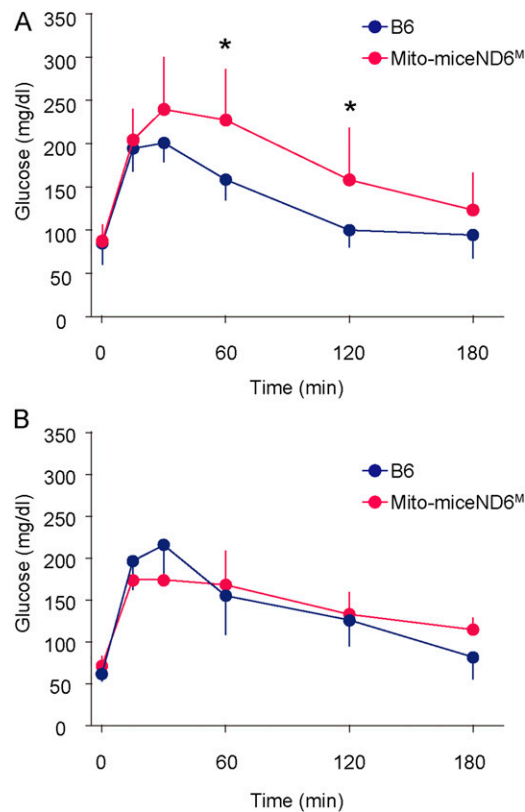

**Fig. S2.** Estimation of blood glucose levels in aged mito-miceND6<sup>M</sup> and age-matched B6 mice before (A) and after (B) NAC administration for 1 wk. To examine the effect of NAC administration on blood glucose levels, the mice were given 10 mg/mL NAC in drinking water ad libitum. Data are represented as mean values with SD ( $n = 5$ ). \* $P < 0.05$  compared with control B6 mice.

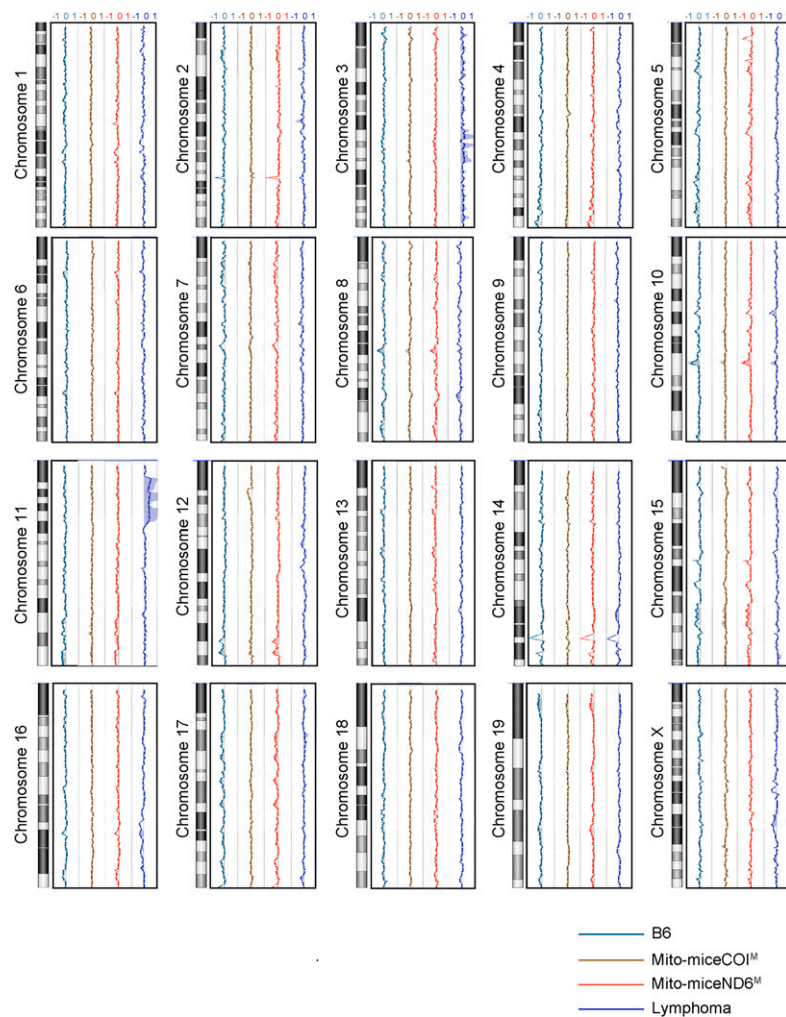

**Fig. S3.** Array CGH analysis of nuclear DNAs from the spleens of mito-miceCOI<sup>M</sup> and mito-miceND6<sup>M</sup>, and from a spleen with B-lymphoma from a mito-miceND6<sup>M</sup>, relative to that in the spleen of a B6 strain mouse. The x axis shows normalized log<sub>2</sub> ratios of fluorescence signals in mito-miceCOI<sup>M</sup>, mito-miceND6<sup>M</sup>, and the B-lymphoma mito-miceND6<sup>M</sup>, relative to those in the B6 strain mouse. The y axis shows chromosome position from centromere to telomere. Copy-number changes of chromosomes 3 and 11 were observed only in B lymphoma.

**Table S1. MEF and MEF-derived cell lines generated in this study**

| Mouse strain              | MEF line, normal         | 3T3 line, immortal      | FS line, tumor          |
|---------------------------|--------------------------|-------------------------|-------------------------|
| B6                        | MEFB6-I                  | 3T3B6-I                 | –                       |
|                           | MEFB6-II                 | 3T3B6-II                | FSB6-II                 |
|                           | MEFB6-III                | 3T3B6-III               | FSB6-III                |
| Mito-miceND6 <sup>M</sup> | MEFND6 <sup>M</sup> -I   | 3T3ND6 <sup>M</sup> -I  | FSND6 <sup>M</sup> -I   |
|                           | MEFND6 <sup>M</sup> -II  | 3T3ND6 <sup>M</sup> -II | –                       |
|                           | MEFND6 <sup>M</sup> -III | 3T3ND6 <sup>M</sup> -II | FSND6 <sup>M</sup> -III |
|                           | MEFND6 <sup>M</sup> -IV  | –                       | –                       |

After establishing six nontransformed 3T3 lines (3T3B6-I, -II, -III; 3T3ND6<sup>M</sup>-I, -II, -III), we cultured them for 1 mo to obtain sufficient numbers of cells for inoculation into B6 mice. We then tested their tumorigenicity. Two 3T3 lines, 3T3B6-III and 3T3ND6<sup>M</sup>-I, formed tumors, but the remaining four lines did not. To allow further spontaneous transformation, we cultivated these four lines for an additional 3 mo, and we found that two of them, 3T3B6-II and 3T3ND6<sup>M</sup>-III, had acquired tumorigenicity. Four fibrosarcoma lines (FSB6-II and -III; FSND6<sup>M</sup>-I and -III) were isolated from the tumor masses formed by inoculation of nontransformed 3T3B6-II and -III and 3T3ND6<sup>M</sup>-I and -III, respectively.
